# Supplementary material for: Factors influencing territorial occupancy and reproductive success in a Eurasian Eagle-owl (Bubo bubo) population
Source: PubMed Central journal article supplement (PMC5388503; doi:10.1371/journal.pone.0175597), 2017-04-11
Supplement: pone.0175597.s002.pdf [file pone.0175597.s002.pdf]

**S1 Table. Summary of model selection process on dynamic occupancy probabilities ( $\psi_t^{[m]}$ ) of a Eurasian Eagle-owl population in south-eastern Spain.**

| Model                                                  | $K$ | AIC     | $\Delta$ AIC | $w$    |
|--------------------------------------------------------|-----|---------|--------------|--------|
| $\psi(\text{State})$                                   | 25  | 2193.86 | 0.00         | 0.4778 |
| $\psi(\text{State} + \text{Crops})$                    | 26  | 2194.55 | 0.69         | 0.3384 |
| $\psi(\text{State} + \text{Ruggedness})$               | 26  | 2195.85 | 1.99         | 0.1767 |
| $\psi(\text{Year} + \text{State} + \text{Ruggedness})$ | 31  | 2203.28 | 9.42         | 0.0043 |
| $\psi(\text{State} + \text{Zone})$                     | 26  | 2205.07 | 11.21        | 0.0018 |
| $\psi(\text{Year} + \text{State})$                     | 30  | 2207.22 | 13.36        | 0.0006 |
| $\psi(\text{Year} + \text{State} + \text{Crops})$      | 31  | 2207.22 | 15.26        | 0.0002 |
| $\psi(\text{Year} \times \text{State})$                | 40  | 2209.80 | 15.94        | 0.0002 |
| $\psi(\text{Year})$                                    | 28  | 2227.62 | 33.76        | 0.0000 |
| $\psi(.)$                                              | 23  | 2227.81 | 33.95        | 0.0000 |
| $\psi(\text{Year} + \text{Ruggedness})$                | 29  | 2229.27 | 35.41        | 0.0000 |
| $\psi(\text{Year} + \text{Crops})$                     | 29  | 2231.09 | 37.23        | 0.0000 |
| $\psi(\text{Year} + \text{Ruggedness} + \text{Crops})$ | 30  | 2232.74 | 38.88        | 0.0000 |
| $\psi(\text{Year} + \text{State} + \text{Zone})$       | 31  | 2235.49 | 41.63        | 0.0000 |
| $\psi(\text{Zone} + \text{Crops})$                     | 24  | 2236.54 | 42.68        | 0.0000 |
| $\psi(\text{Crops})$                                   | 23  | 2236.61 | 42.75        | 0.0000 |
| $\psi(\text{Zone})$                                    | 23  | 2236.61 | 42.75        | 0.0000 |
| $\psi(\text{Ruggedness})$                              | 23  | 2236.61 | 42.75        | 0.0000 |
| $\psi(\text{Ruggedness} + \text{Crops})$               | 24  | 2238.61 | 44.75        | 0.0000 |
| $\psi(\text{Zone} + \text{Ruggedness})$                | 24  | 2238.61 | 44.75        | 0.0000 |
| $\psi(\text{Year} + \text{Zone} + \text{Ruggedness})$  | 30  | 2241.46 | 47.60        | 0.0000 |
| $\psi(\text{Year} + \text{State} + \text{Crops})$      | 30  | 2242.60 | 48.74        | 0.0000 |
| $\psi(\text{Year} + \text{Zone})$                      | 29  | 2244.30 | 50.44        | 0.0000 |

Summary of 23 multi-season, multi-state models for occupancy probabilities, including the total number of estimable parameters ( $K$ ), the value of the Akaike Information Criterion (AIC), the relative differences in AIC ( $\Delta$ AIC) and the Akaike weights ( $w$ ). Models are ordered in terms of  $\Delta$ AIC.  $\psi(.)$  denotes the null (only constant) model. The probabilities of breeding success,  $R$ , were modelled considering the influence of annual

variation, the previous reproductive state of the territory and the ruggedness of the territory  $R(\text{Year} + \text{State} + \text{Ruggedness})$ . The probabilities of detecting occupancy given that the territory was occupied without successful breeding ( $p_{1-4}^{[1]}$ ) and detecting occupancy given that the territory was occupied with successful reproduction ( $p_{1-4}^{[2]}$ ) were modelled based on the *survey* covariate but considered constant across years. The probability of detecting a successful reproduction was fixed as zero for the first survey ( $\delta_1 = 0$ ) and allowed to vary independently for the rest of the surveys, but considered constant across years ( $\delta_{2-4}$ ).
