# Supplementary material for: Factors influencing territorial occupancy and reproductive success in a Eurasian Eagle-owl (Bubo bubo) population
Source: PubMed Central journal article supplement (PMC5388503; doi:10.1371/journal.pone.0175597), 2017-04-11
Supplement: pone.0175597.s003.pdf [file pone.0175597.s003.pdf]

**S2 Table. Summary of model selection process on dynamic reproduction probabilities ( $R_t^{[m]}$ ) of a Eurasian Eagle-owl population in south-eastern Spain.**

| <b>Model</b>                                           | <b>K</b> | <b>AIC</b> | <b><math>\Delta</math>AIC</b> | <b>w</b> |
|--------------------------------------------------------|----------|------------|-------------------------------|----------|
| $R(\text{Year} + \text{State} + \text{Ruggedness})$    | 25       | 2193.86    | 0.00                          | 0.8417   |
| $R(\text{Year} + \text{Ruggedness} + \text{Crops})$    | 24       | 2199.54    | 5.68                          | 0.0492   |
| $R(\text{Year} + \text{Ruggedness})$                   | 23       | 2199.69    | 5.83                          | 0.0456   |
| $R(\text{Year} + \text{Ruggedness} + \text{Scrub})$    | 24       | 2200.75    | 6.89                          | 0.0269   |
| $R(\text{Year} + \text{Zone} + \text{Ruggedness})$     | 24       | 2201.65    | 7.79                          | 0.0171   |
| $R(\text{Year} + \text{Ruggedness} + \text{Distance})$ | 24       | 2201.69    | 7.83                          | 0.0168   |
| $R(\text{Year} + \text{State} + \text{Scrub})$         | 25       | 2206.53    | 12.67                         | 0.0015   |
| $R(\text{Year} + \text{State} + \text{Crops})$         | 25       | 2208.17    | 14.31                         | 0.0007   |
| $R(\text{State} + \text{Ruggedness})$                  | 20       | 2210.09    | 16.23                         | 0.0003   |
| $R(\text{Year} + \text{State} + \text{Distance})$      | 25       | 2211.13    | 17.27                         | 0.0001   |
| $R(\text{Year} + \text{State} + \text{Zone})$          | 25       | 2211.60    | 17.74                         | 0.0001   |
| $R(\text{Year} + \text{State})$                        | 24       | 2212.49    | 18.63                         | 0.0001   |
| $R(\text{Ruggedness} + \text{Crops})$                  | 18       | 2218.92    | 25.06                         | 0.0000   |
| $R(\text{Year} + \text{Crops} + \text{Scrub})$         | 24       | 2219.33    | 25.47                         | 0.0000   |
| $R(\text{Year} + \text{Crops})$                        | 23       | 2219.76    | 25.90                         | 0.0000   |
| $R(\text{State} + \text{Scrub})$                       | 20       | 2220.18    | 26.32                         | 0.0000   |
| $R(\text{Year} + \text{Scrub})$                        | 23       | 2220.54    | 26.68                         | 0.0000   |
| $R(\text{Year} + \text{Distance} + \text{Crops})$      | 24       | 2221.21    | 27.35                         | 0.0000   |
| $R(\text{Year} + \text{Zone} + \text{Scrub})$          | 24       | 2221.28    | 27.42                         | 0.0000   |
| $R(\text{State} + \text{Crops})$                       | 20       | 2221.44    | 27.58                         | 0.0000   |
| $R(\text{Ruggedness} + \text{Distance})$               | 18       | 2221.63    | 27.77                         | 0.0000   |
| $R(\text{Year} + \text{Zone} + \text{Crops})$          | 24       | 2221.73    | 27.87                         | 0.0000   |
| $R(\text{Year} + \text{Distance} + \text{Scrub})$      | 24       | 2222.27    | 28.41                         | 0.0000   |
| $R(\text{State} + \text{Distance})$                    | 20       | 2222.56    | 28.70                         | 0.0000   |
| $R(\text{Year} \times \text{State})$                   | 34       | 2223.28    | 29.42                         | 0.0000   |
| $R(\text{State})$                                      | 19       | 2223.82    | 29.96                         | 0.0000   |
| $R(\text{Ruggedness})$                                 | 17       | 2223.87    | 30.01                         | 0.0000   |
| $R(\text{Zone} + \text{Ruggedness})$                   | 18       | 2225.23    | 31.37                         | 0.0000   |
| $R(\text{Year} + \text{Distance})$                     | 23       | 2225.24    | 31.38                         | 0.0000   |

|                                                  |    |         |       |        |
|--------------------------------------------------|----|---------|-------|--------|
| $R(\text{Ruggedness} + \text{Scrub})$            | 18 | 2225.37 | 31.51 | 0.0000 |
| $R(\text{Year} + \text{Zone} + \text{Distance})$ | 24 | 2226.79 | 32.93 | 0.0000 |
| $R(\text{Year} + \text{Zone})$                   | 23 | 2226.82 | 32.96 | 0.0000 |
| $R(\text{Year})$                                 | 22 | 2227.53 | 33.67 | 0.0000 |
| $R(\text{State} + \text{Zone})$                  | 20 | 2229.43 | 35.57 | 0.0000 |
| $R(\text{Zone} + \text{Scrub})$                  | 18 | 2239.33 | 45.47 | 0.0000 |
| $R(\text{Distance} + \text{Crops})$              | 18 | 2239.81 | 45.95 | 0.0000 |
| $R(\text{Distance} + \text{Scrub})$              | 18 | 2240.22 | 46.36 | 0.0000 |
| $R(\text{Scrub})$                                | 17 | 2241.39 | 47.53 | 0.0000 |
| $R(\text{Crops})$                                | 17 | 2242.25 | 48.39 | 0.0000 |
| $R(\text{Distance})$                             | 17 | 2242.26 | 48.40 | 0.0000 |
| $R(\text{Zone} + \text{Distance})$               | 18 | 2242.79 | 48.93 | 0.0000 |
| $R(\text{Zone} + \text{Crops})$                  | 18 | 2243.82 | 49.96 | 0.0000 |
| $R(\text{Zone})$                                 | 17 | 2245.04 | 51.18 | 0.0000 |
| $R(.)$                                           | 17 | 2247.45 | 53.59 | 0.0000 |

Summary of 44 multi-season, multi-state models for successful reproduction

probabilities, including the total number of estimable parameters ( $K$ ), the value of the Akaike Information Criterion (AIC), the relative differences in AIC ( $\Delta\text{AIC}$ ) and the Akaike weights ( $w$ ). Models are ordered in terms of  $\Delta\text{AIC}$ .  $R(.)$  denotes the null (only constant) model. The probabilities of territorial occupancy  $\psi$  were modelled considering only the previous state of the territory  $\psi(\text{State})$ . The probabilities of detecting occupancy given that the territory was occupied without successful breeding ( $p_{1-4}^{[1]}$ ) and detecting occupancy given that the territory was occupied with successful reproduction ( $p_{1-4}^{[2]}$ ) were modelled based on the *survey* covariate but considered constant across years. The probability of detecting a successful reproduction was fixed as zero for the first survey ( $\delta_1 = 0$ ) and allowed to vary independently for the rest of the surveys, but considered constant across years ( $\delta_{2-4}$ ).
